# Supplementary material for: Identification of the Capsicum baccatum NLR Protein CbAR9 Conferring Disease Resistance to Anthracnose
Source: MDPI journal article supplement (doi:10.3390/ijms222212612), 2021-11-22
Supplement: s1 [file s1]

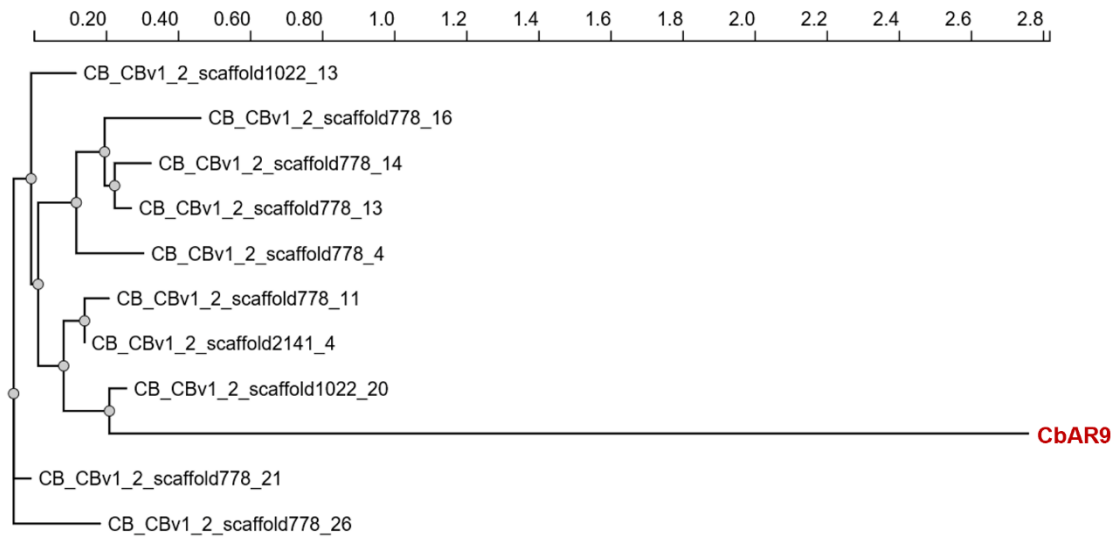

**Supplementary Figure S1.** A phylogenetic tree of the identified NLR proteins. A neighbor-joining tree was constructed with NGPhylogeny software using the full-length protein sequence of CbAR9 (CB.CBv1.2.scaffold1468.5) and CB.CBv1.2.scaffold1022.13/1022.20/2141.4/778.4/778.11/-778.13/778.14/778.16/778.21/778.26. The scale bar represents the proportion of site changes along each branch.

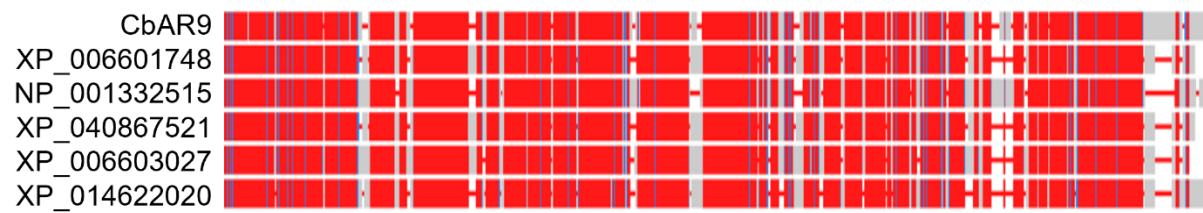

| Accession    | Organism                    | Description                                          |
|--------------|-----------------------------|------------------------------------------------------|
| XP_006601748 | <i>Glycine max</i>          | NBS-LRR disease-resistance protein scn3r1 isoform X2 |
| NP_001332515 | <i>Arabidopsis thaliana</i> | Disease resistance protein RPP8L3                    |
| XP_040867521 | <i>Glycine max</i>          | NBS-LRR disease-resistance protein scn3r1 isoform X1 |
| XP_006603027 | <i>Glycine max</i>          | Disease resistance protein RPP13                     |
| XP_014622020 | <i>Glycine max</i>          | Disease resistance protein RPP13                     |

**Supplementary Figure S2.** Identification of proteins with a similar NLR domain as CbAR9 in various plant species. The proteins were identified using the SmartBLAST program.

**A**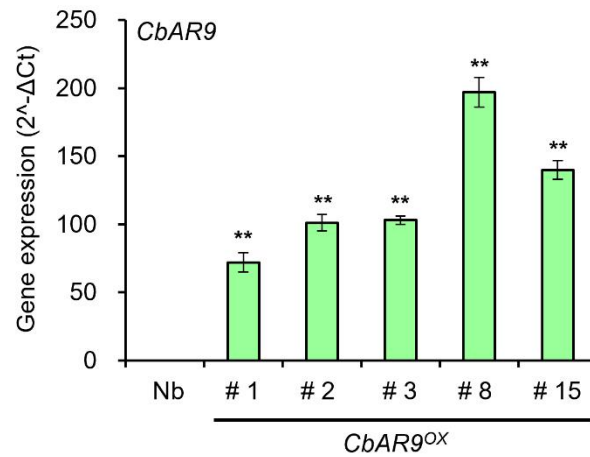**B**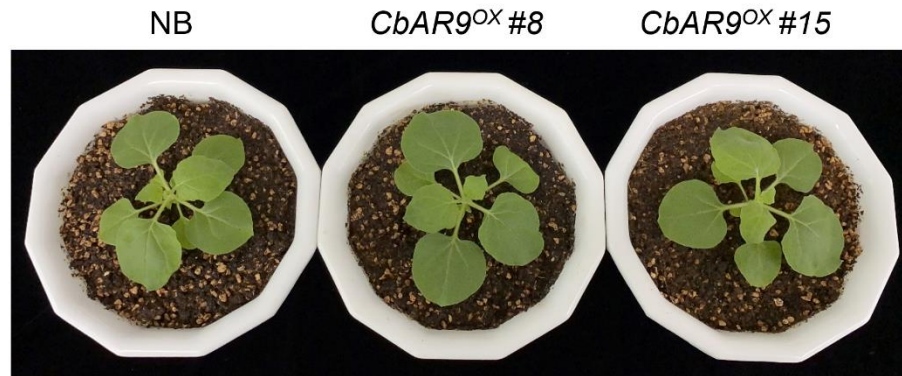

**Supplementary Figure S3.** Verification and phenotype of *CbAR9*-overexpressing plant lines. (A) Analysis of *CbAR9* expression in *CbAR9*<sup>OX</sup> and the wild-type *Nicotiana benthamiana* plants, as determined by RT-qPCR. *NbActin* served as the internal reference. Data are shown as means ± SD. Asterisks indicate statistically significant differences from controls (\*\* *P* < 0.01). The experiments were repeated at least three times, with similar results. (B) Growth phenotype of *CbAR9*<sup>OX</sup> without biotic stress. Plants were grown in pots containing soil in a greenhouse under a programmed 16-h light/8-h dark photoperiod at 28 °C. The humidity was adjusted to 50%.

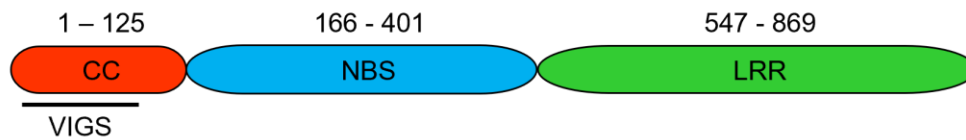

Atggcagatgtagcattacaacttgctgtggagatattggtccgataataaaggagacttgaagttgattgatagtggaagaagat  
tctgcaaatgaactactgggagaactaatcggttaaaggccttcttcaggatgctgcaaaatatcgtcaaagcaacagtgaaacagt  
gaaaaacttgtcaaggagggtccaagttatggatatgaagctgaggggtctcattgataagctcatggttgagatgaagctgcacaaaa  
gaaaaataaatttgaacagatcgtggatctaaatatcacaaaacccttaaggatcttgaagaacatcaaagcaattcttgaaaggt  
gaagaagattcgcgaaagcaaatctgcaggcttccaggcaaaagccaatccttgattatcagccggaattgtgccccggcacacag  
gatacttattggaagaaaacaaagttgtcggtttgatgaggaagcaaaagtagtgatcaagcgacttgtaaaggaaccaaagattta  
gatgttatccctgtggtgggtgcttgactagggaaaaccactctggcaataaaaatctctaagatccgcaagttcctatgatttttc  
ctgaccatttgggtgagcgtaggcccgcaatccaaactgaaggggtcttccttagtattctgaaagcgttcaagaaacagactacaga  
atatcaagacatggatgtgaaggaattgccaagataatatgtgaattcattgacaaaggcggcgaatgtctcattgtattggatgacgt  
gtggacaacagacgttggatgtgctcatgaatgtttccccgaaaaaagcaaaaggccaccgtatcatgatcaccactcgtgatggac  
gtattgtagatatgccaatgctaactcctcacatgttgaatttctgaaatggaggaaaagttccaattgttgtaaatagatttttggcag  
taatattcgaagggtgtcctgaagagtaatagaacatggggaaagcatcgcaaaacaatgtttggagtgccacttcagttgtgtgaatt  
gcaggagctctaagaggacgcaccagcaaaagtactggaaaatggttgaggacaatgtaaaacacctataaataaagatgatga  
cccaaaaagctgctgaaatttggaaatgagttatgtttatctaccgaagagatgaaggcgtgttctatattgtggtgctttccaca  
aggcttgaattctgcttgaagttgatccgttatggattccgagggttgataaactccaacttaacaggaagccccgaggatata  
gcagagtattacttgaacgacctatcaacaggaacttagtaatatagtagtcagaaaagggttaattgttcaagtaaaaacatgccgtat  
tcatgacatgttacaccagtttgaagatagaggctaataacgaaggcttttccacgaagtatgtgaaaaacagatcaggctggtctt  
tctataccagatctagatagttcgctcacttgtgtattccactctctctttgaaagcttttctccaccgaacctatgctgagcatgttagat  
cattctgtgttttccacaaaacaaaaagaaagtgagaagcttagcaacattcaacaactccacaaagccttccactgggtcagggtctt  
ggatgttgaatccctgaatttagttcagcaagattttagagagctatattcatttgagggtacatttccatctcagttgaaagcagtgcttcc  
gacgttctcggttaaatttgaatttacaactcttataattatacaaaggcatccaccattgaaattaaagctgaaatggaacatgct  
acggttgaggcatgtgcacaccaatgtccctgcaaaattgccatctctactaccacacagtagatgaatcttctgcctacaaactttg  
tctaaagttgaccagaaaagttgcagagaagatgcgcttgcgagggtgttaattcagaaaactaactattcaagggaaaatggctg  
atcttctgaaattaacatgggtgggttcaacaacttcaaaagctaaagtgcctggagcaattgaaactgctgaatgataatgtagacag  
atccatgagcggagttctcaccttctcccgattccccaaatttctatgcaaaactgaagaagttacttgcataatacaagtttgcttg  
agcgaggcgagtagattgggagcagttggaatgccttgaggctctaaagctaaaagaaaatgcatttagtggaacaacatgggattca  
gagattggagggtttaaactaaaggtattatggattgaaagggcagaccttaaaacttgaaggtcgcaaatcttcaatttcaaaga  
cttcagtgcttgtttaaactcctgcgatgagcttgagggtgtaccaattgagttggctgatgtacgtaccctcaagaaatgacgctggag  
cacacaaaaaaggctatcaaatctgcaatgctatcaaatgcaggaagcaagagatgcatcgtgagcacatgcagaaagctgcag  
aaagcaaatctggaacagaaatcgaaggcaagaaaaaggtgagtgagatattgagagtttcaaatcagagctcactatattcccc  
ctgaaacggctgattgcaaccccaaacattga

**Supplementary Figure S4.** The target region of *CbAR9* for VIGS. The cDNA sequence of *CbAR9*. Yellow fluorescent sequence indicates the target region of VIGS. Red, CC domain; blue, NBS domain; green, LRR

| CB.CBv1.2.<br>Scaffold | Amino acid sequence                                                                                                                                                                                                                                                                                                                                                                                                                                                                                                                                                                                                                                                                                                                                                                                                                                                                                                                                                                                         |
|------------------------|-------------------------------------------------------------------------------------------------------------------------------------------------------------------------------------------------------------------------------------------------------------------------------------------------------------------------------------------------------------------------------------------------------------------------------------------------------------------------------------------------------------------------------------------------------------------------------------------------------------------------------------------------------------------------------------------------------------------------------------------------------------------------------------------------------------------------------------------------------------------------------------------------------------------------------------------------------------------------------------------------------------|
| 1468.5<br>(CbAR9)      | MADVALQLAVEILVPIIKETWKLIDSGKEDSANELLGELNRLKAFLQDAAKYR<br>QSNSEQWKNFVKEVQVMVYEAEGIDKLMVEMKLHQKKNKFEQIVDLKYHKT<br>KDLVEDIKAILGKVKKIREANLQAFQAKPILDYQPEIVAPGTQDTLLEENKVV<br>GFDEEAKVVIKRLVKGTDLVPIPVGLPGLGKTTLAIKISKDPQVSYDFFLT<br>IWVSVGPQSKLKGVFLSILKAFKKQTTEYQDMDVKELPKIICEFIDKGGKCLI<br>VLDDVWTTDVVDAVMNVFPEKSKGHRIMITTRDGRIGRYANANPHMLKFLEME<br>ESFQLLVNRVFGSNIRRCPEELIEHGESI AKQCFGVPLAVVVIAGALRGRTSK<br>SDWKMVEDNVKHLINKDDDPKSLKFVEMSYVYLPEEMKACFLYCGAFPQGFE<br>IPAWKLIRLWISEGLINSNLTGSPEDIAEYYLNDLINRNLVIVVQKRANGQVK<br>TCRIHDMHLHQFCKIEANNEGLFHEVCEKTDQAGLSIPDLSSRHLCIPLSLK<br>AFISTEPYAEHVSFLCFSTKQKESEKLSNIQQLHKAFLVRLDVESLEFSF<br>SKYFRELYHLRYISISVESSVLPFTFFGKFWNLTLLIYTKASTIEIKAEIWNM<br>LRLRHVHTNVPKLPSSSTHTVDESSRLQTL SKVAPESCREALARACNLRLK<br>TIQGMADFLINMGGFNNFQKLKCLEQLKLLNDNVDRMSGVLHLPAPFPKF<br>LCKLKKLTLSNTRFAWSEASRLGQLECLEVLKLENAFSGTTWDSEIGGFNQL<br>KVLWIERADLKTWKVANLQFQRLQCLVVKSCDELEAVPIELADVRTLQEMTLE<br>HTKKAIKSANAIKCRKQEMHREHMQKAAESKSGTEIEGKKKVS EDMESFKFEL<br>TIFPPETADCNPKH |
| 1022.13                | MLSFFANLCIALFVIPLTSCNPAVDMAHSSVASLMRTIESLLTSNSPMQTLIC<br>GHRDEICPLHEKISSLEVFLKNFEKNNVGELTDLEVQIKEVANIVEQTIQLRV<br>TEVLLANDENLREKSHERLSDSLQQVAEDIDRIWKESTNIQDKGKHASKESTV<br>QEFLSSSRNILNVENSMVGRDDQRKRLVEDLTRSYSGEPKVIAIVGMGGIGKT<br>TLANAVYNDACIRSHFDVCAWATISQQHNVKEILLSLLRSTKSDSFDMNDEAE<br>LANMLQKSLKGKRYLIVLDDMWKTESWDAVRLCFPSENKSGGILLTRNSEVA<br>RDAGTENLSLQMDLMGPDESWNLFKSVAFANEALPSEFETIGKQIVEKCHGLP<br>LTI AVVARLLKSKRAIEEWENVAKDVKSFVTNDPDERCSRVLRLSYNHLTSDL<br>KTCLLHFGIFPEDSEIPVKNLMRSWMAEGFLKLENDLEGEAVKCLQELVDRCL<br>VLVCKKSLDGT KIRSCKVHDLIYDLCLREIERDNIFIMNDIVLEFDSGWTYLS<br>LRKMKPFKRVTVD EIDYCRSGLYRALLTPVHRQLRDHDNDLFNRTSRIFSSY<br>PCTSHLFRKSELIHFKLLKVLELRNIKMDHFPVQILSLIWLRYLLLYFRKYLE<br>IPPEICRLWNLQTFIVQGPSLWKITFP EEILGLMQLRHLKLPEFYLPNPPSVS<br>ADKGSHVSFSNIQTISSMSPCCCTKEFIMRIQNVKELGLSAYQIDSSDGPLNS<br>LVHLQQL ETLSLT YRFGGFWPASAKAFPATLKKLKLDKTYLSWSYLDIIAELP<br>NLEVLKLMYRACDGEWRPTVMGFNRLKLLIDNDLKYWKATDDDFPVLERL<br>VLRRCHYLEKIPIEFAGIHS LQLIELNWGP PKLGDSAARIQQEQEEIGNNPV     |
| 1022.20                | MGGIGKTTLANEVYNDACIRSHFDVCAWATVSQQHNVKEILLSLLRSTKGDTF<br>DMNDEAE LANMLQKSLKGKRYLIVLDDMWKSEAWDAVRLCFPSENKSGGILLT<br>TRNTDVALDAGTKNLSLQMDLMGLDES WNLFKSVAFANEALPSEFETIGKQIA<br>DECHGLPLTI AVVAGLLKSKRAIENWKSVEEDVKSFVSNPDERCSR VVGLSY<br>DHLTSDLKACLLHFAIFPEGSEIPVKNLRRSWMAEGFLKLENDLEGEAEKCLQ<br>ELVDRCLVLVCKKSLDGT KIRSCKVHDLIYDLCLREIQRGNVFIMNDIVLYVA<br>EPECLDLSMHKMQPFRVPGDLIDNPYFGLYRALLTPVHRQLRDHDNDLLKQ<br>TCSIFSFHLNDSCFILKSELIHFKLLKVLVLRHRDIDNFPLQILSLIWLRYLS<br>LVVHGHLLIPPEICRLWNLQTLVVKEYDPSFVTCPVQIWELVQLRHLKLPRFY<br>LPDRPSVSVDKERDVGF SNLQTTSRLSSCCCTREVIMGIQNVKKEISGDEDD<br>YESFWESGLVNNLVHLHQLETLSLTGTYILWPRTL PASTPSAKSF PATLKKLN<br>LTSTYLSWSYLDIIAELPNLEVLKLMGFACCGEGEEWHPIVMGFNRLKILLIE<br>RSFLKYWKATDDNFVLERLVLINCKCLKEIPIEFAEIHSLQLIEVALPYKSN<br>IPWAIWNPPLTQRGSPQPECAARVGVSDSDTPHGSRPA                                                                                                                                                                                              |

| CB.CBv1.2.<br>Scaffold | Amino acid sequence                                                                                                                                                                                                                                                                                                                                                                                                                                                                                                                                                                                                                                                                                                                                                                                                                                                                                                                                                                                                                                                                                                                                                                                                                                                                                                                                                                                                                                                                                                                                                                                                                                                                                                                                                                                                                                                                                                                                                                                                                                                                                                                                                                                                                                                                                                                                                                                                                     |
|------------------------|-----------------------------------------------------------------------------------------------------------------------------------------------------------------------------------------------------------------------------------------------------------------------------------------------------------------------------------------------------------------------------------------------------------------------------------------------------------------------------------------------------------------------------------------------------------------------------------------------------------------------------------------------------------------------------------------------------------------------------------------------------------------------------------------------------------------------------------------------------------------------------------------------------------------------------------------------------------------------------------------------------------------------------------------------------------------------------------------------------------------------------------------------------------------------------------------------------------------------------------------------------------------------------------------------------------------------------------------------------------------------------------------------------------------------------------------------------------------------------------------------------------------------------------------------------------------------------------------------------------------------------------------------------------------------------------------------------------------------------------------------------------------------------------------------------------------------------------------------------------------------------------------------------------------------------------------------------------------------------------------------------------------------------------------------------------------------------------------------------------------------------------------------------------------------------------------------------------------------------------------------------------------------------------------------------------------------------------------------------------------------------------------------------------------------------------------|
| 2141.4                 | <p> M Q N V E N S M V G R D D H R K W L V E D L T R S Y S G E P K V I P I V G M G G I G K T T L A N K V Y N N<br/> A C I R S H F D V C A W A T V S Q Q H N V K E I L F S L L R S T K G G T F D M N D E A E L A N M L Q R S L<br/> K G K S Y L I V L D D M W K S E A W D A V R L C F P S E N K G S G I L L T T R N T E V A R D A G T E N L S<br/> L Q M D L M G S N E C W N L F K S V A F A N E A L P S E F A T I G K Q I A E K C H G L P L T I A V V A G L<br/> L K F K R A I E D W K S V A K D V K I F R E D S E I P A K K L M R S W M A E G F L K L E N D L E G E A E K<br/> C L Q E L V D R C L V L I C K K S L D G T K I R S C Y G I C R H S L F K V R G H T L F S V L V T F P G E I<br/> W G L M Q L R H L K L P R F N L P D C P S G S V D K G R H L D F S N L Q T I S Y L S L D C C T K E V I M G<br/> I Q N V K E L G I C G Y E T D S N R I L N N L V H L Q Q L E T L S F I F C F A Q F P G T L K K L K L E S T<br/> F L S W S Y L D I I T E L P N L E V L K L M G F A C D G E E W H P N V R G F T R L K L L L I E D Y F L E Y<br/> W R Q F S C P </p>                                                                                                                                                                                                                                                                                                                                                                                                                                                                                                                                                                                                                                                                                                                                                                                                                                                                                                                                                                                                                                                                                                                                                                                                                                                                                                                                                                           |
| 778.4                  | <p> M A H A S V A S L T G T I E S L L T S N S P M Q S L S C D H R E E I C D L H K K I S S L E I F L K N F D K<br/> N N V Y G Q I T D L E V E L K E V A N I A E Q T I Q L R V T E V V L V N D E K T H E R L S D T L Q L V A E<br/> D I D R I W K V S T K I K D K G K Q V S E G S L V Q D F S S I N N I L N V N N H T V G R D D Q K E R L L<br/> E H L T K S Y S G E S K V I P I V G M G G I G K T T L A K E V Y S Y E S I L R R F D V S A W A T V S Q Q Q<br/> N I K E I L L S L L Q S T I K M D D T V K M K G E A E V K S L K R K R S R I L L T T R N D E V G C Y A G I<br/> E N I S L R M S F M D Q D E S W N L F K S A A F S S E A L P Y E F E T V G K Q I A D E C H G L P L T I V V<br/> V A G L L K S K R A I K D W E S V A K D V K S F F T N D P D E R C S R V L G L S Y N H L T S D L K T C L L<br/> H F G I F R E D S E I P A K K L M R S W M A E G F L K L E N D L E G E A E K C L Q E L V D R C L V L V C K<br/> R S L D G T K I R S Y K V H D L I Y D L C L K E I Q R E N I F I M K D I V V W V C I S E C Q F L R M H K M<br/> Q P F K C V T D D E I D Y S R Y G L Y R A L L T P V H R Q L R D H D N N D L L K R T H S I F P F G L N D L<br/> F F M F K S E L I H F K L L K V L N L S H V R I D S F P L Q I L N L I W L R Y L A L L I Y V N L K I P R E<br/> I C R L W N L Q T F I V K G M R L S V I T F P E E I W G L M Q L R H L K L S R F Y L P D C P S G S V N K G<br/> R H L D F S N I Q T I S Y L S Q R C C T K E V I M G I Q N V K E L G I S G G D E I D S N G P L N N L V H L<br/> Q Q L E T L S F I F C L K I L P A S A K A F P A T L K N L K L E R T L T S W S Y L D I I A E F P N L E V L<br/> K L M D H A C L G D E W H P I V R G F T R L K L L L I E E D N F L K H W K A T D D N F P V L E R L V L K K<br/> C H N Y K E I P I K S S S Y P C T S A Y S F Q I T Q K V L D L S H V R I D S F P L Q L L N L I W L R Y L A<br/> L L I Y V N L K I P R E I C R L W N L Q T F I V K G M R L S V I T F P E E I W G L M Q L R H L K L S R F Y<br/> L P D C P S G S V N K G R H L D F S N I Q T I S Y L S Q R C C T K E V I M G I Q K V K E L G I S G G D E I<br/> D S N G P L N N L V H L H V Q E E S K K I Q D H N G R Q E S T W S L A Q D K S S E K L L N L E V S N N M V<br/> G R G K E K R V L E E L R G G S S D E L K I I P I V G M G F I G K T T L A K Q V F N V K E I L L S L L Q<br/> S I I Q I D D K V Y S R D E A E L A D L L Q K S L K R K R Y L I V M D D I W S D K A W D D M R Q C F P I D<br/> N N R S </p> |
| 778.11                 | <p> M A H A S V A S L M R T I E S L L T I N S P M R S L S F D H R E E L S A L R E K T S S L E V V V K N F E K<br/> N N V C G E I T D F E V E V K E V A N F V E H T I Q L Q V T E V L L A N D E N L R E K A H W W L S D S L Q<br/> Q V E E D I D I I W E E S I M I Q D E G K Q A S K E P T V Q E F P S S S K D M Q T V E S S M V G R D D H R<br/> K R K R L V E D L T R S Y S G E P K V I P I V G M G G I G K T T L A N E V Y N N A C I R S H F D V C A W A<br/> T V S Q Q H N V K E I L F S L L R S T K G G T F D M N D E A E L A N M L Q R S L K G K R Y L I V L D D M W<br/> K N E A W D A V R L C F P S E N K G S G I L L T T R N T E V A R D A G T E N L S L Q M D L M G P N E C W N<br/> L F K S V A F A N E A L P S E F E T I G K Q I A E K C H G L P L T I A V V A G I L K S K R A I E D W K S V<br/> A K D V K S L V T N D P D E R C S R V L G L S Y N H L T S D L K A C L L H F G I F R E D S E I P A K K L M<br/> R S W M A E G F L K L E N D L E G E A E K C L Q E L V D R C L V L I C K K S R D G T K I R S C K V H D L I<br/> Y D L C L R E I Q R G N V F I M N D I V L D S M P V T G L F R V L L T P V H R Q L R D H D N N D H L K R T<br/> R S I F S C H L K Y S Y I L K S E L I H F K L L S V L E L R H R L I D N F P P V I L S L I W L R Y L S L<br/> L C R E N L D I P P E I C R L W N L Q T F I V Q G M R T Y I F P S D L V T F P E E I W G L M Q L R H L K L<br/> P R F N L P D C P S G S V D K G R H L D F S N L Q T I S Y L S L D C C T K E V I M G I Q N V K E L G I C G<br/> Y E T D S N R I L N N L V H L Q Q L E T L S F I F C F A Q F P A C A K A F P A M L K K L K L E S T F L S W<br/> S Y L D I I A E L P N L E V L K L M G F A C D G E E W H P N V R G F T R L K L L L I E D Y F L K Y W N A T<br/> D D N F P V L E R L V L N K C H N L K E I P I E F A E I H T L Q L I E L E R C L P E L G E S A A R I Q K E<br/> Q E D L G N D P V D V R I S R P C D D D G G G G G G G D D E E Y F D A V D V A E D D D D E N S D V D V A<br/> E D D D D E D S D V D V A K D D D D E D F D A D A A E H D D </p>                                                                                                                                                                                                                                                                                                                                                                                                         |

| CB.CBv1.2.<br>Scaffold | Amino acid sequence                                                                                                                                                                                                                                                                                                                                                                                                                                                                                                                                                                                                                                                                                                                                                                                                                                                                                                                                                                                                                                                                                                                                                                                                                                                                                                                                                                                                                                                                                                                                                                                   |
|------------------------|-------------------------------------------------------------------------------------------------------------------------------------------------------------------------------------------------------------------------------------------------------------------------------------------------------------------------------------------------------------------------------------------------------------------------------------------------------------------------------------------------------------------------------------------------------------------------------------------------------------------------------------------------------------------------------------------------------------------------------------------------------------------------------------------------------------------------------------------------------------------------------------------------------------------------------------------------------------------------------------------------------------------------------------------------------------------------------------------------------------------------------------------------------------------------------------------------------------------------------------------------------------------------------------------------------------------------------------------------------------------------------------------------------------------------------------------------------------------------------------------------------------------------------------------------------------------------------------------------------|
| 778.13                 | MITPLLGYTPDLHSGSFDPNVRCSYHSDVQGHSDIEDCRALRSEIERMIQDKSI<br>MVSGHNHQERNENTVDMahasVASLMRTIESLLTINSPMRSLSFDHREELCAL<br>REKVSSLEVfVKNFEKNNVSGEMTDFEVEVKEVASASEHTFQLRVTEVLLEND<br>EKIHERLSDTLQLVAEDIDRIWKVSTKIQDKGKQASKESTVQDFSSSKNNILN<br>VNNIMVGRDDQKERLLEDLTASYSGEpkvipivgmGGIGKTTLAKEVYNNEsv<br>LRRFDVHAWATVSQQHDKRKEILLGLLRSTIKMEDRVKTRGEAELADMLQKSLK<br>RKRYLIVLDDIWSCEVWDGVRQCFPTEDNAGSRILLTTRNNEIACYAGTENLS<br>MQMDFMDQDESwnlFESAafSSEALTxNTfPSVNRIP                                                                                                                                                                                                                                                                                                                                                                                                                                                                                                                                                                                                                                                                                                                                                                                                                                                                                                                                                                                                                                                                                                                                                |
| 778.14                 | MVVWCIKAPAKDRtTRPYHMQLYLEFCKLLFYpFIPEIPFELYLIITEQIWKP<br>GEKILQISVKTIEFGLREAMIAEDEPQRGKAHEQLSDSVQQDIITKANVNIVD<br>MAHANVASLLRTIESLLSSNSPMRSVSCDHREDFsALHEKISSLEVFLKNFEK<br>NNVSRELTDLEVQIKEVANIVEQTIQLRVTEVVLKRHIMVGRDDQKERLLEDL<br>TASYSGEpkvipivgmGGIGKTTLAKEVYNNEsvLRRFDVHAWATVSQQHDKR<br>EILLGLLRSTIKMEDRVKTRGEAELADMLQKSLKRKRYLIVLDDIWSCEVWDG<br>VRQCFPTEDNAGSRILLTTRNNEVACYAGTENLSMQMDFMDQDESwnlFESAA<br>FSNEASSSEFETIGKKIAEKCHGLPLTIVVVAGLLKSKREIEYKSVAKDVTS<br>FVTNDPDKQCSRVLGLSYDHLTSDLKTCLLHFGIFPEDSEIPVKKLMRSWMAE<br>GFLKLENDLEGEAEKCLQDLVNRCVLVLCKKSRDETKIISCKVHDLIYELCLR<br>EVERGSVfSMNDIELEVSYSRGLYLSMRKMqPFKHVTGDLSYFGLYRALLTPV<br>HRQLRDHDNNDLSKRTRSIFsFHLKDSSFFLKSELIHFKLLKVLELRHIEIDN<br>FPLQISSLIWLRYLSLVCNANFDVPPEICRLWNLQTFIVQGSQTVITITITIT<br>FPeeIWGLMQLRHLKVkrVYLPNPPSVsADKGShtRFSNIQTTSYLSSCCCTK<br>EvisGIRNVKKLGfSGNNLSDSGLHSNLVYLQqLEILSFIRCSCILLPVTSak<br>VFPATLKKLKLESTYLDWSYMDIIAELPNLEVLKLIDDACDGEewQQNVKGFT<br>RLKLLFIHDNRLKCWKATNDNFPVLERLMLSKCSTLKEMPIEFaeIHSLQIE<br>LTsCLPGLGKYAARIQKEQQDLGNNPVDVRISNPfTEEVmANKDTELvVTNQI<br>GSSGnENVGDNEEIrkLRrQIIEMHRAWANGLPPPPVPTDNLdYLSLPPVSH<br>AQLPIFVDMPQHAsRSTPGQqYPTTSNIHFLTPQYKITTCsALPAIHAFaAPL<br>PSEAPAFNVNPTVVIpHSTSNpILNIFSDQHYPKPTFKSTGPYVFPQPPEFP<br>PNTEKpVMTEEQEEIARkLRSLELTmKNLQGLGGYKSVsYKDLCMFPGVHLPL<br>GfKMPKfEKYDGHGDPIAhLRRYCNQLRGAGGKEELLMAyFGESLSGLASEwF<br>VDQDIDKWNsWDDLANEfVQQfQYNMELIPDEKSLTNMNKKSTETfREYAIRW<br>REQAARVKPPMKESKIVEAFIQVQDETYyQHLLPALGKPFVEVPKMGEMIEDG<br>IKTGRIVSfATLKATTQEIHKGLGSMGGRKNMEDASAIaVGQQAWARGPHHRY<br>PRAQTHVYAQAptNHYNpLYPVPppPYQVYNAQPYVQPPSYPHWRAPTLSSH<br>PPTPHTY |
| 778.16                 | MQSLICDQRVELCALHEKVSSLEVFLKNFEKNNVSGEMTDFEVEVKEVASAAE<br>HAIQLSVTEVVLGENKSQKKKAHRRCHQSLQQVAKDMDRIWTGSTKIQDKGKQ<br>VSKEsLVHDFSSSTNDILKVKNMVGRDDQMKRLLKDLTRSCSDEPKVIPIVG<br>MGIGIKTTLAKEVYNHKPILCHFDVHAWATVSQQHNKKEIFLGLLRSTIKMDD<br>TVKMKSEAEADKLQKSLKRKRYLIVLDDIWSCEVWDGLTRCFPTEDNAGSRI<br>LLTTRNNELACYVDTDNLsLWMNFMDQDESWSLfkSAafSSEALPYEFQTVGK<br>QSQMNVTEKDLEGEAEKCLQDLVDRCLVLVRMRSRDETKIRsCKVHDLIYDLC<br>LREIQRGNVFTMNDVVFekPDDCEPAHVSSGCHSLRMALLTPVHRQLRDQDNN<br>DLLKQTRSIFfyDRGISTLILKSELILKSELTHFKLLKVLDVSHVRIDSfPLQ<br>ILSLIWLRYSLQLLRNLDIPSEICRLWNLQTVIVKGPTGLVITLPEEIWGLM<br>QLRHLKVISSYRQNPLTVsIDKGSrVGSSNIQTTSYLSSCCCTKLvFSRIQNV<br>KKLAfRGNNLSDSGLHNNLVYLQqLEILSFIRCSCILLPVTSakAFpATLKKL<br>NL                                                                                                                                                                                                                                                                                                                                                                                                                                                                                                                                                                                                                                                                                                                                                                                                                                                                                           |

| CB.CBv1.2.<br>Scaffold | Amino acid sequence                                                                                                                                                                                                                                                                                                                                                                                                                                                                                                                                  |
|------------------------|------------------------------------------------------------------------------------------------------------------------------------------------------------------------------------------------------------------------------------------------------------------------------------------------------------------------------------------------------------------------------------------------------------------------------------------------------------------------------------------------------------------------------------------------------|
| 778.21                 | MAHACVASLMRTIESLLTSNSPMQSLIYDHREELCALCEKVSSLEVVANNFEEK<br>NNVLGEMAELEVEVKEVASAVEHTIQLRVTEVLENDEKSIKIQDKGKQASKES<br>TVQEFPPSSPKDILNVENCMVGRDDQQRKRLVEDLTRSKSVEPKVIPIIGMGGIA<br>NMLKKSIMGKRYLIVLDDMWKTEAWDAVKLCFPPSGNKGSVILLTTRITEVARD<br>AGTKNLSLKTIEELPSDLKTIGKQIAEKCHGLPLTIAVVAGLLKSKRAIADWE<br>NVAKDVKPFVTNDPDKQCSRVLGLSYNHLTSGLKTCLLHFGFFPEDSEIPTKK<br>LMRSWMAEGFLKLENDLE                                                                                                                                                                         |
| 778.26                 | MADLEVQIKEVANVVEQTIQLRVTEVVLENDVKAQERLSDSLQQVAEDIDCIW<br>TESTKIQDKGKHASKESTVQEFPPSSRSILNVENSMVGRDDQQRKQLVEDLTRS<br>YSGEATVPIVGMGGNLVEPSVFYKGDVFTSEAEALAYILQKSLKVALYAGT<br>KNSLPMRFMDQDESWNLFKSVAFSSEELPSDLETIGKQIADECHRLWNLQTFI<br>VHGPMLSVITFP EEIWGLMQLRHLKLPRIYLPDCPSGSVDKGRHMDFSNLQTI<br>SYLSSRCCTKEVIMGIQNVKKLRIRRDASSSGPLNNLVHLHQLETNLFTDSLS<br>GLLPASAKAFPATLKKLKLKETGLSWPYLDIIAELPDLEVLKLMDNACLGNEW<br>YPNVRGFTRWKVLLIKRNDLKYWKATDDNFPVLERLMIRSCYYLKEIPIEF AE<br>IHTLQLIELIMCLPELGGFAARIQKEQEELGNNPVDVRISYQWSHSSSFTCYC<br>GFQGDVISLWKNVAGFVF |

**Supplementary Table S1.** Amino acid sequence of the identified candidate NLR proteins.

| Gene          | Primer sequence                             | Purpose |
|---------------|---------------------------------------------|---------|
| <i>CbAR9</i>  | F: AAAAAGCAGGCTAAATGGCAGATGTAGCATTACAACCTGC | Cloning |
|               | R: AGAAAGCTGGGTATCAATGTTTGGGGTTGCAATCAG     | Cloning |
|               | R: AGAAAGCTGGGTAATGTTTGGGGTTGCAATCAGC       | Cloning |
|               | F: TCTAGAATGGCAGATGTAGCATTACAAC             | VIGS    |
|               | R: GGTACCTTTGTGATATTTAAGATCCACGAT           | VIGS    |
|               | F: CCATCCTCTACTACCCACAC                     | qRT-PCR |
|               | R: TGAAAGTTGTTGAACCCACC                     | qRT-PCR |
| 778.14        | F: CCTGCATTAGGCAAGCCATTTG                   | qRT-PCR |
|               | R: CTGTTGTCCAACCTGCAATGGC                   | qRT-PCR |
| 778.16        | F: GGCTGAGGTACCTATCATTGC                    | qRT-PCR |
|               | R: TTGAAGAACCCACGCGACTC                     | qRT-PCR |
| 1022.13       | F: ACTCTTCTGATGGGCCTCTC                     | qRT-PCR |
|               | R: CCGCTATGATGTCCAAGTACG                    | qRT-PCR |
| <i>PR1</i>    | F: GAGGACAACGTCCGTATGGT                     | qRT-PCR |
|               | R: AACTCCAGTTACTGCACCATTA                   | qRT-PCR |
| <i>PR2</i>    | F: CTACTTAAGCTTTGCAAGCACCA                  | qRT-PCR |
|               | R: AGATCTCTTTCTCATCGTCACTT                  | qRT-PCR |
| <i>ACT</i>    | F: GTGCTGAGAGATTCCGTTGC                     | qRT-PCR |
|               | R: ATGGTTGAGCCACCACTGAG                     | qRT-PCR |
| <i>NbPR1</i>  | F: GTGCCCAAATTCTCAACAAGACT                  | qRT-PCR |
|               | R: AAATCGCCACTTCCCTCAGC                     | qRT-PCR |
| <i>NbPR2</i>  | F: CAACATAACCTTCCACTCTTAGCCA                | qRT-PCR |
|               | R: CATAGAATCCAAAAGGGCATCAAAAAGA             | qRT-PCR |
| <i>NbPR10</i> | F: TGAGATTGTTGAGGGTGATGGGG                  | qRT-PCR |
|               | R: TTGTCGCCTAAAACATCTCCTTCGA                | qRT-PCR |
| <i>NbACT</i>  | F: CCCAGATGGGCAGGTGATCA                     | qRT-PCR |
|               | R: GAGTTGTATGTGGTCTCGTGGATTC                | qRT-PCR |

**Supplementary Table S2.** Sequence of primers used in this study.
